# Supplementary figures and images for: Open-label, Multicenter, Phase II Study of RC48-ADC, a HER2-Targeting Antibody–Drug Conjugate, in Patients with Locally Advanced or Metastatic Urothelial Carcinoma
Source: Oxford University Press journal article supplement (doi:10.1158/1078-0432.ccr-20-2488), 2020-10-27

Figure 1

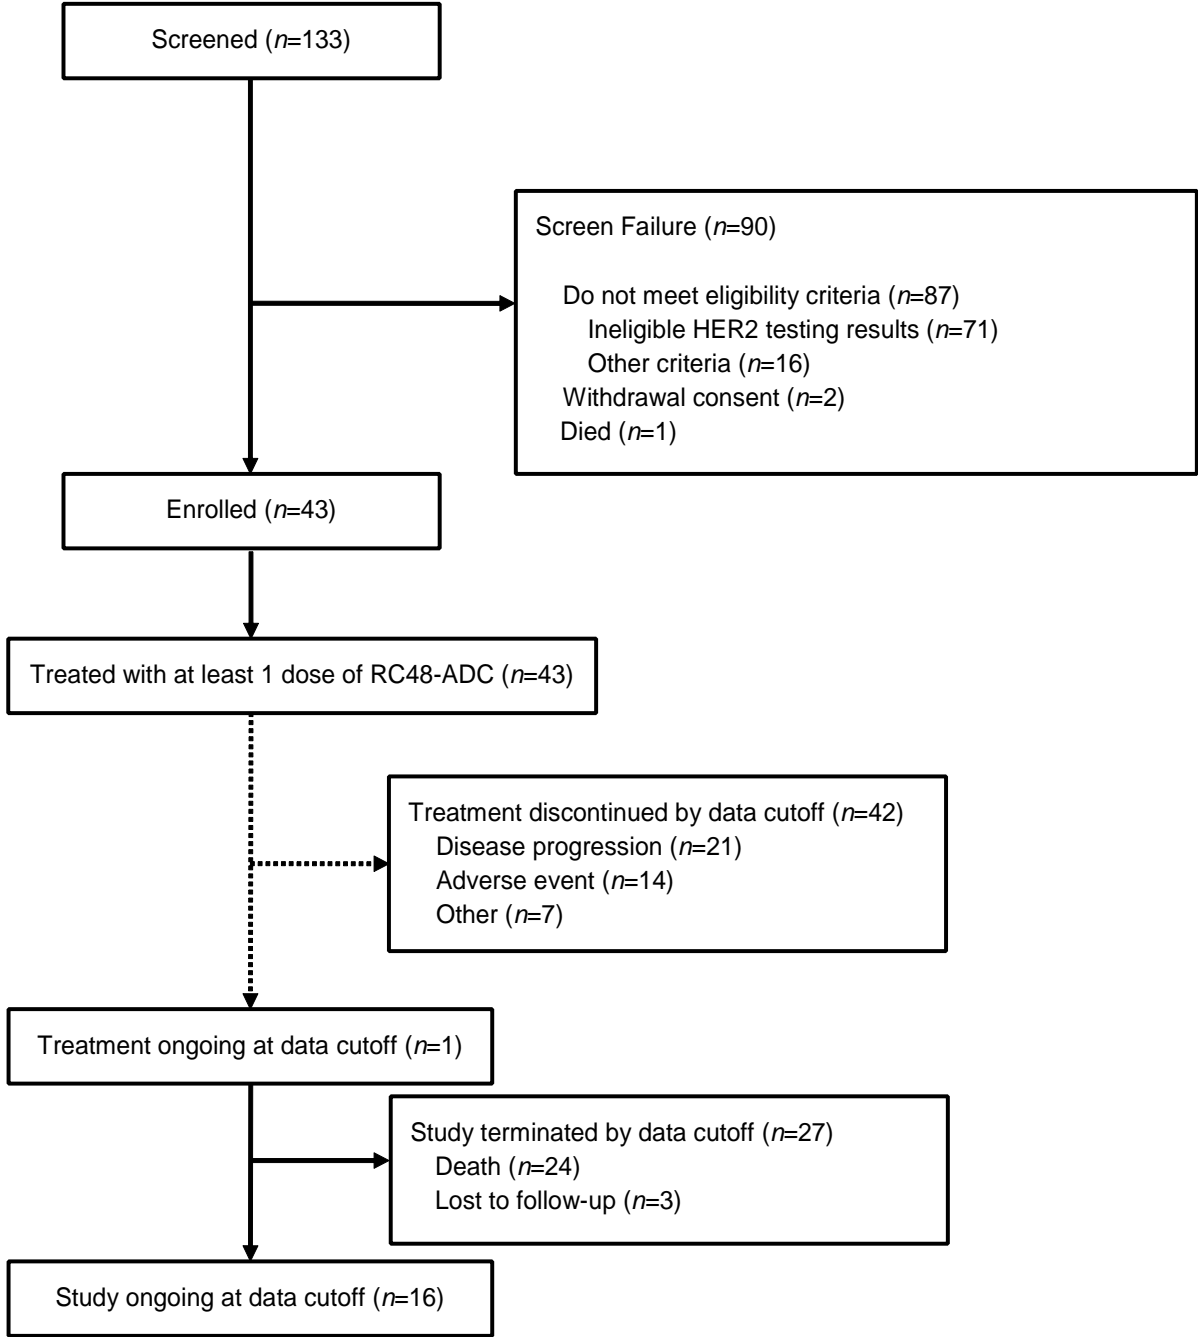

Supplement: 246058_3_supp_6651430_q79234.pdf [file 246058_3_supp_6651430_q79234.pdf]
